# Supplementary material for: Prognostic impact of ACTN4 gene copy number alteration in hormone receptor-positive, HER2-negative, node-negative invasive breast carcinoma
Source: PubMed Central journal article supplement (PMC7283275; doi:10.1038/s41416-020-0821-y), 2020-04-08
Supplement: 41416_2020_821_MOESM1_ESM.pdf [file 41416_2020_821_MOESM1_ESM.pdf]

**Supplementary Table S1. Correlation of *ACTN4* gene status with clinicopathological characteristics (US cohort).**

| Characteristics              | Total | <i>ACTN4</i> FISH |     | <i>P</i> value* |
|------------------------------|-------|-------------------|-----|-----------------|
|                              |       | NCN               | CNI |                 |
| <b>Total</b>                 | 261   | 238               | 23  |                 |
| <b>Age</b>                   |       |                   |     |                 |
| ≤ 50                         | 61    | 58                | 3   | 0.304           |
| > 50                         | 200   | 180               | 20  |                 |
| <b>Histology</b>             |       |                   |     |                 |
| Invasive ductal carcinoma    | 235   | 213               | 22  | 0.487           |
| Others                       | 26    | 25                | 1   |                 |
| <b>Histological grade</b>    |       |                   |     |                 |
| 1 or 2                       | 233   | 216               | 17  | <b>0.024</b>    |
| 3                            | 28    | 22                | 6   |                 |
| <b>Nuclear grade</b>         |       |                   |     |                 |
| 1 or 2                       | 226   | 210               | 16  | <b>0.021</b>    |
| 3                            | 35    | 28                | 7   |                 |
| <b>Adjuvant chemotherapy</b> |       |                   |     |                 |
| Yes                          | 24    | 23                | 1   | 0.705           |
| No                           | 237   | 215               | 22  |                 |
| <b>Hormone therapy</b>       |       |                   |     |                 |
| Yes                          | 87    | 75                | 12  | 0.062           |
| No                           | 174   | 163               | 11  |                 |

**Abbreviations:** FISH, fluorescence *in situ* hybridization; NCN, normal copy number; CNI, copy number increase.

\*Fisher's exact test. *P* values of < 0.05 are shown in bold.

**Supplementary Table S2. Cox proportional hazards model analysis of factors associated with recurrence (US cohort).**

| Characteristics           | Univariate analysis |           |                 | Multivariate analysis |        |                 |
|---------------------------|---------------------|-----------|-----------------|-----------------------|--------|-----------------|
|                           | Hazard Ratio        | 95% CI    | <i>P</i> value* | Hazard Ratio          | 95% CI | <i>P</i> value* |
| <b>Age</b>                |                     |           |                 |                       |        |                 |
| ≤ 50/> 50                 | 0.77                | 0.34-1.76 | 0.53            |                       |        |                 |
| <b>Histology</b>          |                     |           |                 |                       |        |                 |
| IDC/others                | 1.12                | 0.34-3.71 | 0.86            |                       |        |                 |
| <b>Histological grade</b> |                     |           |                 |                       |        |                 |
| 1-2/3                     | 1.34                | 0.46-3.89 | 0.59            |                       |        |                 |
| <b>Nuclear grade</b>      |                     |           |                 |                       |        |                 |
| 1-2/3                     | 1.07                | 0.37-3.09 | 0.9             |                       |        |                 |
| <b>ACTN4 FISH</b>         |                     |           |                 |                       |        |                 |
| NCN/CNI                   | 2.73                | 1.03-7.24 | <b>0.04</b>     |                       |        |                 |

**Abbreviations:** IDC, intraductal carcinoma; FISH, fluorescence *in situ* hybridization; NCN, normal copy number; CNI, copy number increase; CI, confidence interval.

\*Cox regression analysis. *P* values of < 0.05 are shown in bold.

**Supplementary Table S3. Cox proportional hazards model analysis of factors associated with death (US cohort).**

| Characteristics           | Univariate analysis |            |                 | Multivariate analysis |        |                 |
|---------------------------|---------------------|------------|-----------------|-----------------------|--------|-----------------|
|                           | Hazard Ratio        | 95% CI     | <i>P</i> value* | Hazard Ratio          | 95% CI | <i>P</i> value* |
| <b>Age</b>                |                     |            |                 |                       |        |                 |
| ≤ 50/> 50                 | 0.7                 | 0.24-2.00  | 0.5             |                       |        |                 |
| <b>Histology</b>          |                     |            |                 |                       |        |                 |
| IDC/others                | 1.36                | 0.31-5.99  | 0.68            |                       |        |                 |
| <b>Histological grade</b> |                     |            |                 |                       |        |                 |
| 1-2/3                     | 1.87                | 0.53-6.58  | 0.33            |                       |        |                 |
| <b>Nuclear grade</b>      |                     |            |                 |                       |        |                 |
| 1-2/3                     | 1.45                | 0.41-5.11  | 0.56            |                       |        |                 |
| <b>ACTN4 FISH</b>         |                     |            |                 |                       |        |                 |
| NCN/CNI                   | 4.01                | 1.29-12.49 | <b>0.016</b>    |                       |        |                 |

**Abbreviations:** IDC, intraductal carcinoma; FISH, fluorescence *in situ* hybridization; NCN, normal copy number; CNI, copy number increase; CI, confidence interval.

\*Cox regression analysis. *P* values of < 0.05 are shown in bold.

## Supplementary Figure S1

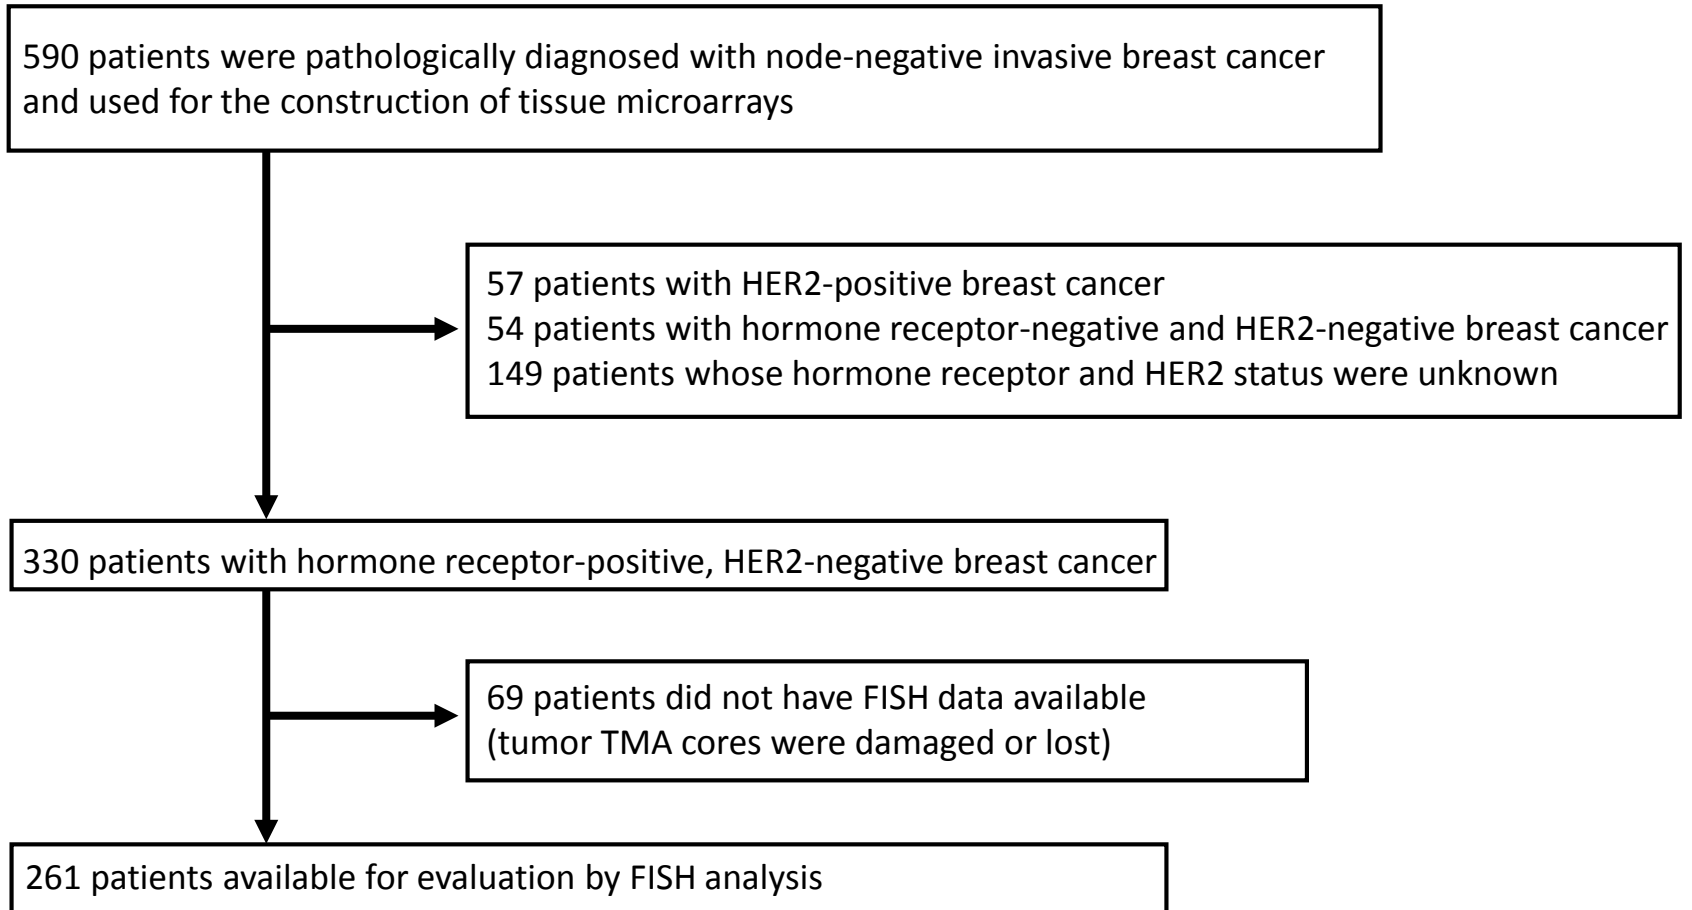

# Supplementary Figure S2

**A**

## Pathological stage I

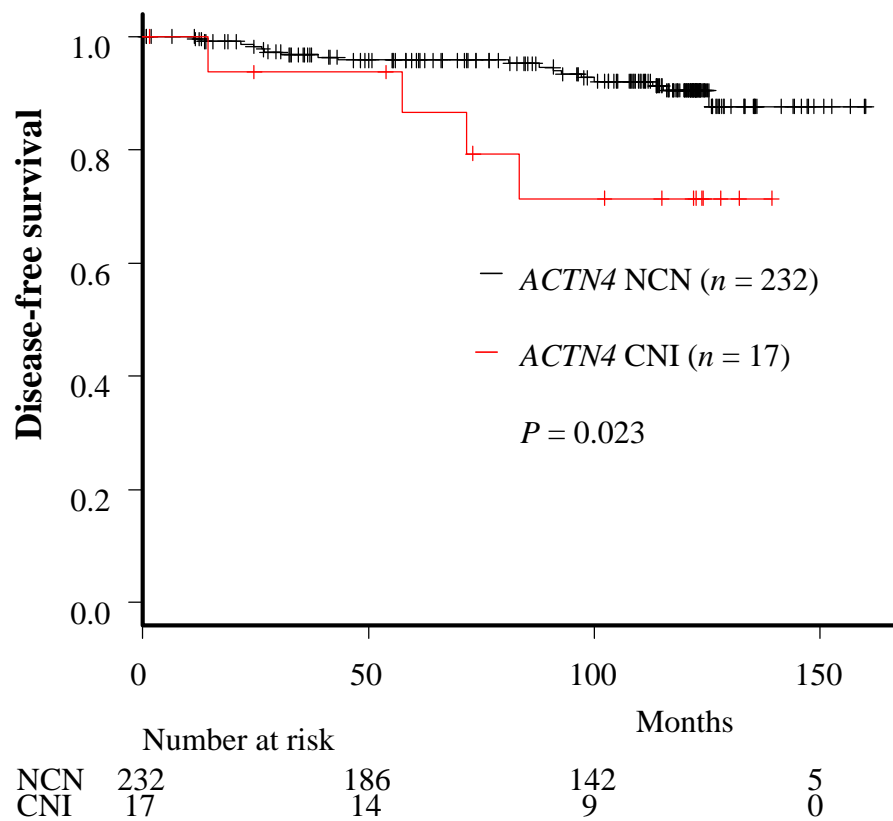

**B**

## Pathological stage I

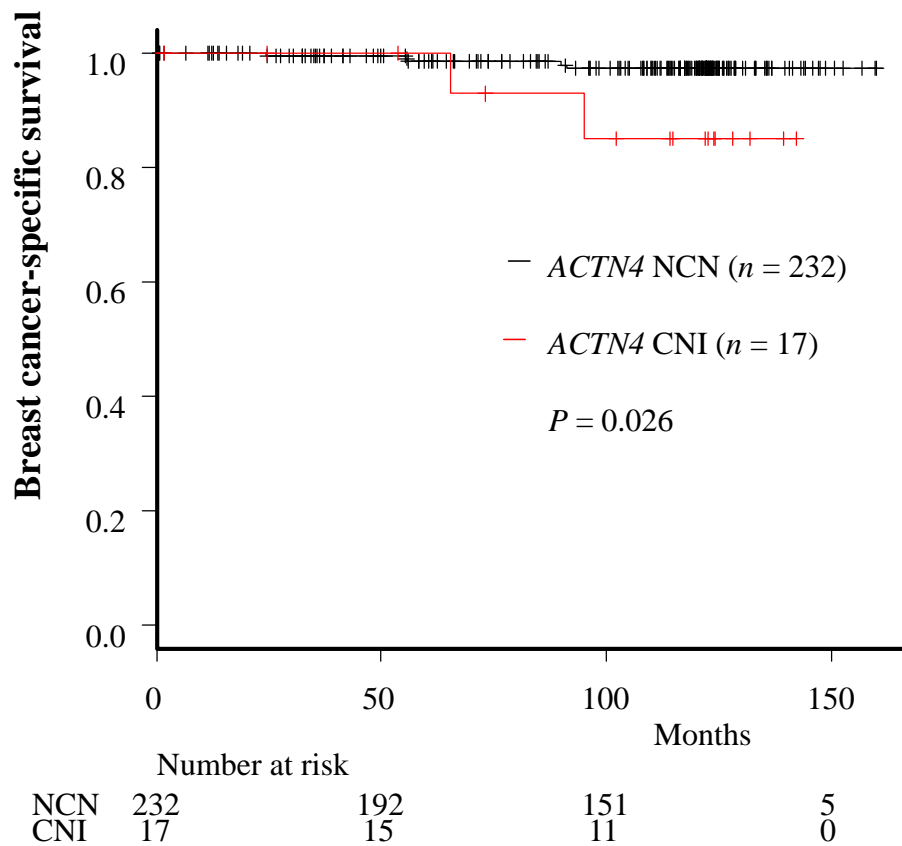

# Supplementary Figure S3

**A**

**Pathological stage II**

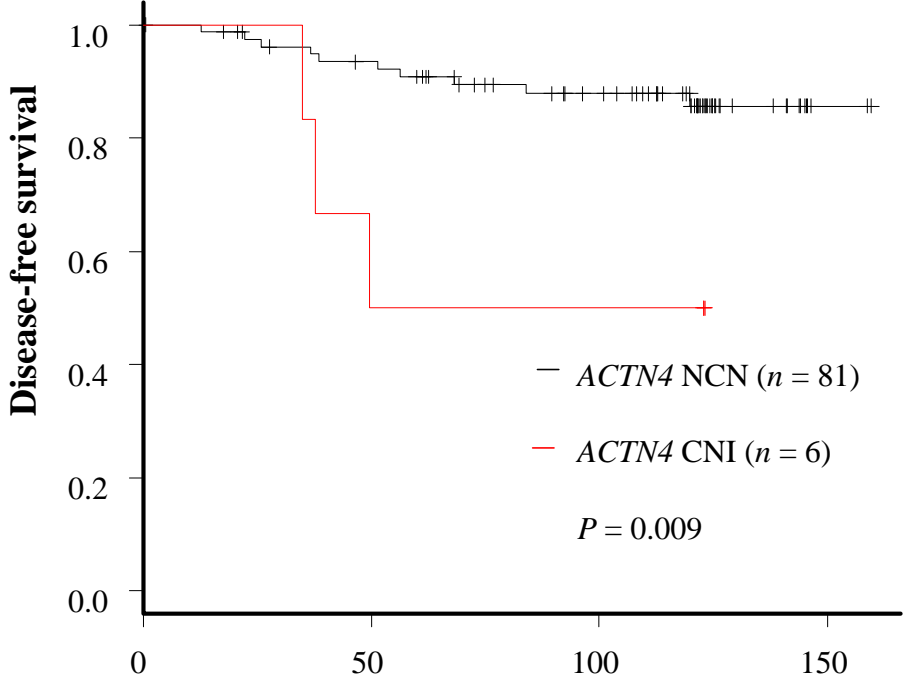

— *ACTN4* NCN (*n* = 81)  
 — *ACTN4* CNI (*n* = 6)  
*P* = 0.009

|     | Number at risk |    |     |     |
|-----|----------------|----|-----|-----|
|     | 0              | 50 | 100 | 150 |
| NCN | 81             | 70 | 53  | 2   |
| CNI | 6              | 3  | 3   | 0   |

**B**

**Pathological stage II**

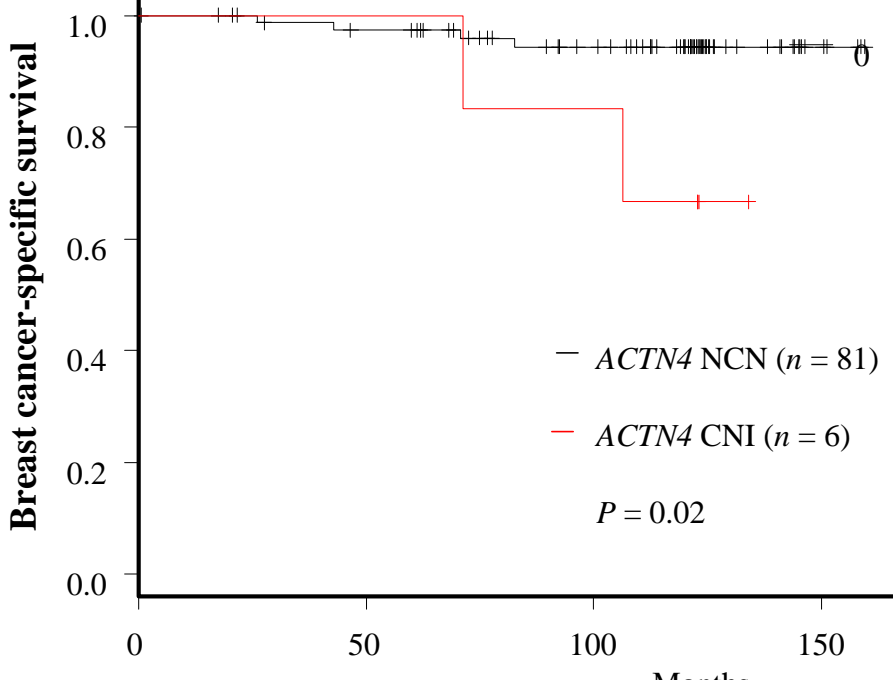

— *ACTN4* NCN (*n* = 81)  
 — *ACTN4* CNI (*n* = 6)  
*P* = 0.02

|     | Number at risk |    |     |     |
|-----|----------------|----|-----|-----|
|     | 0              | 50 | 100 | 150 |
| NCN | 81             | 73 | 57  | 5   |
| CNI | 6              | 6  | 5   | 0   |

# Supplementary Figure S4

**A**

**HER2-positive**

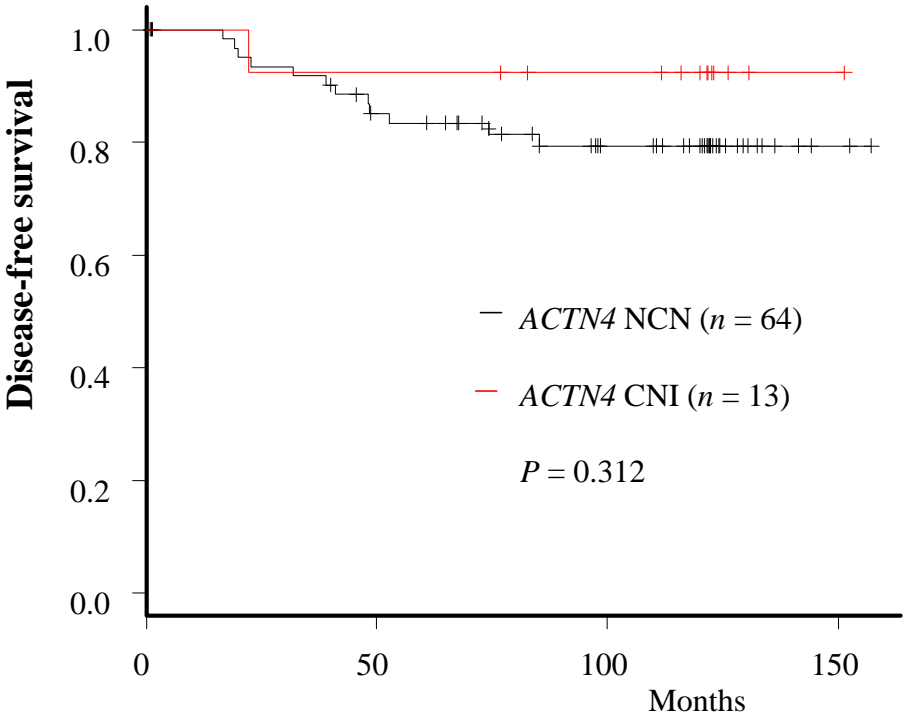

|     | Number at risk |    |     |     |
|-----|----------------|----|-----|-----|
|     | 0              | 50 | 100 | 150 |
| NCN | 64             | 49 | 33  | 2   |
| CNI | 13             | 12 | 10  | 1   |

**B**

**HER2-positive**

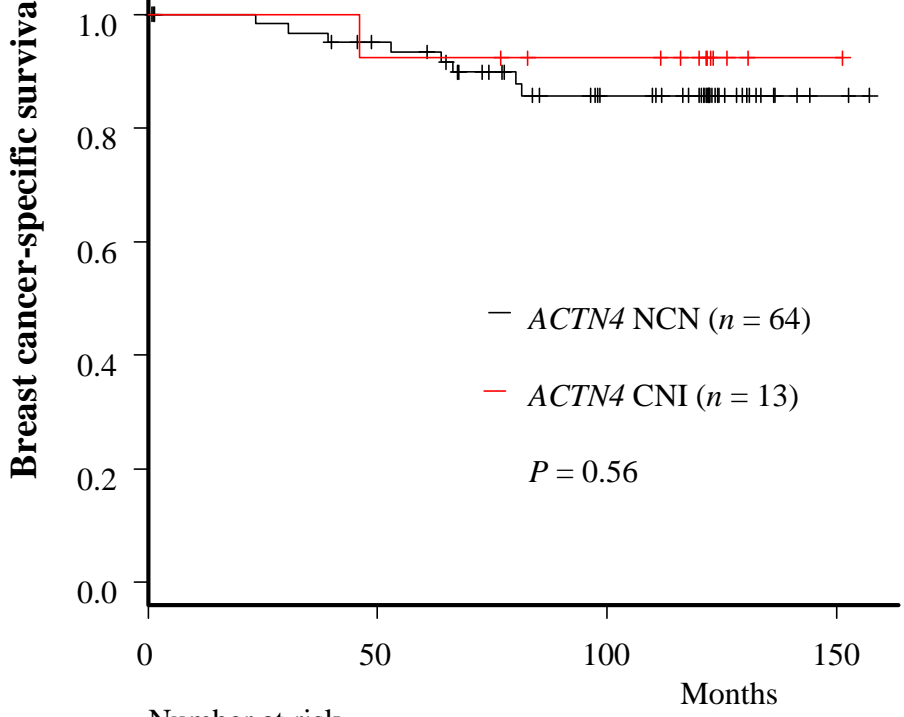

|     | Number at risk |    |     |     |
|-----|----------------|----|-----|-----|
|     | 0              | 50 | 100 | 150 |
| NCN | 64             | 55 | 36  | 2   |
| CNI | 13             | 12 | 10  | 1   |

# Supplementary Figure S5

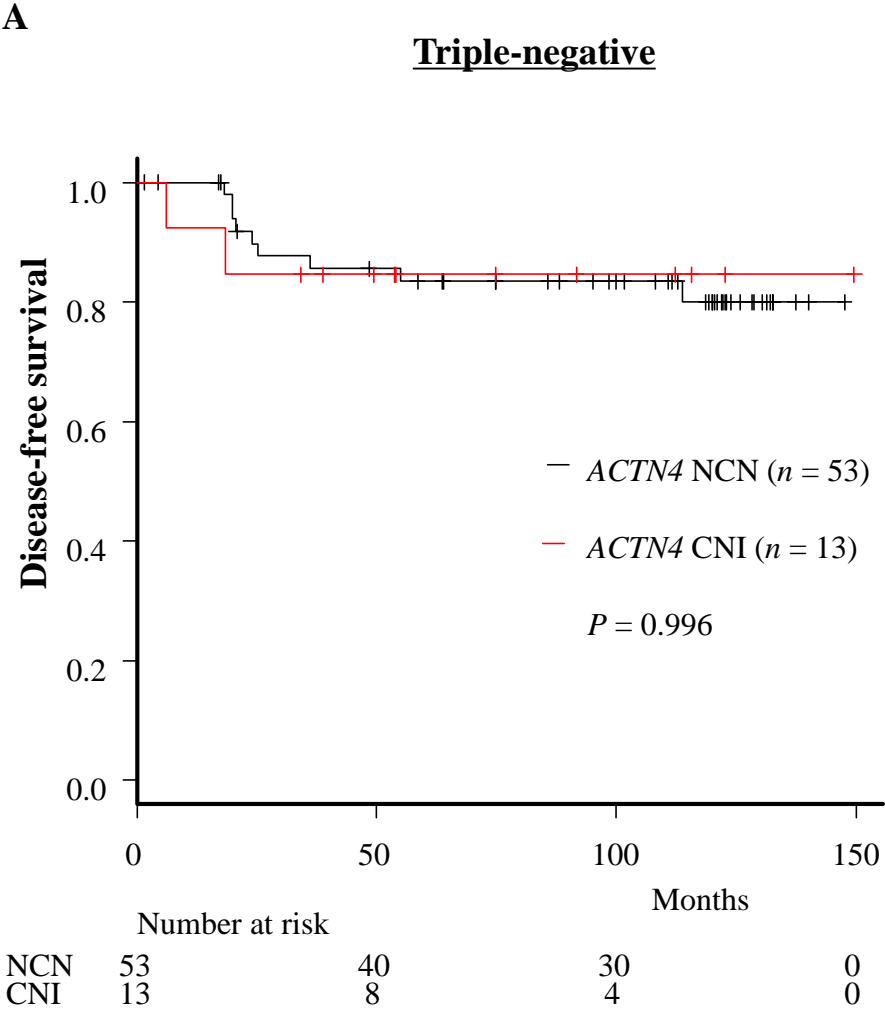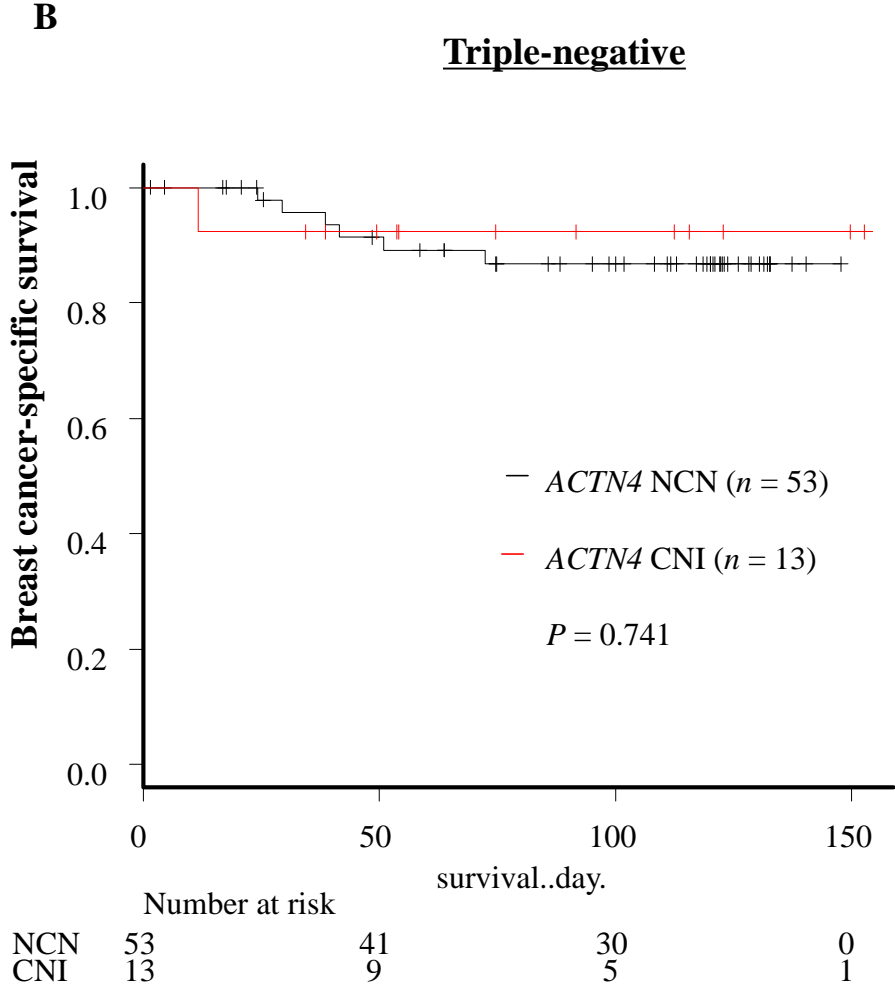



## **Legends for Supplementary Figures**

**Supplementary Figure S1. Selection of eligible individuals (US cohort).**

**Supplementary Figure S2. Survival curves for stage I patients according to the copy number of *ACTN4* (Japanese cohort).**

Kaplan-Meier estimation of DFS (**A**) and BCSS (**B**) of patients with HR-positive, HER2-negative, node-negative pathological stage I invasive breast cancer carrying (red) and not carrying (black) *ACTN4* CNI. Differences between the curves were assessed using the log-rank test.

**Supplementary Figure S3. Survival curves for stage II patients according to the copy number of *ACTN4* (Japanese cohort).**

Kaplan-Meier estimation of DFS (**A**) and BCSS (**B**) of patients with HR-positive, HER2-negative, node-negative pathological stage II invasive breast cancer carrying (red) and not carrying (black) *ACTN4* CNI. Differences between the curves were assessed using the log-rank test.

**Supplementary Figure S4. Survival curves of patients with HER2-positive tumors according to the copy number of *ACTN4* (Japanese cohort).**

Kaplan-Meier estimation of DFS (**A**) and BCSS (**B**) of patients with HER2-positive, node-negative invasive breast cancer carrying (red) and not carrying (black) *ACTN4* CNI. Differences between the curves were assessed using the log-rank test.

**Supplementary Figure S5. Survival curves of patients with triple-negative tumors**

**according to the copy number of *ACTN4*** (Japanese cohort).

Kaplan-Meier estimation of DFS (**A**) and BCSS (**B**) of patients with triple-negative, node-negative invasive breast cancer carrying (red) and not carrying (black) *ACTN4* CNI.

Differences between the curves were assessed using the log-rank test.
